# Supplementary material for: Impact of SARS-CoV-2 Variants and Vaccination on Pediatric Febrile Seizures: A Retrospective Cohort Study
Source: Research Square preprint supplement (doi:10.21203/rs.3.rs-6189452/v1), 2025-03-18
Supplement: Supplementary file 1 [file d8b1631093e2e7eb11d7060c.docx]

## **Abbreviations**

| ****Abbreviation**** | ****Full Meaning**** | ****Approximate Location in Paper**** |
| --- | --- | --- |
| ****ACE2**** | Angiotensin-Converting Enzyme 2 | Introduction (Section 1) |
| ****AIC**** | Akaike Information Criterion | Materials and Methods (Section 2.4) |
| ****aOR**** | Adjusted Odds Ratio | Results (Section 3) |
| ****AUC**** | Area Under the Curve | Results (Section 3.2) |
| ****BBB**** | Blood-Brain Barrier | Introduction (Section 1) |
| ****CI**** | Confidence Interval | Results (Section 3) |
| ****CNS**** | Central Nervous System | Introduction (Section 1) |
| ****CRP**** | C-Reactive Protein | Methods (Section 2.2) |
| ****CSF**** | Cerebrospinal Fluid | Discussion (Section 4.6 - Limitations) |
| ****FS**** | Febrile Seizures | Abstract / Introduction (Section 1) |
| ****IL-1β**** | Interleukin-1 Beta | Discussion (Section 4.1) |
| ****IL-6**** | Interleukin-6 | Abstract / Methods (Section 2.2) |
| ****IQR**** | Interquartile Range | Results (Section 3.1) |
| ****MIS-C**** | Multisystem Inflammatory Syndrome in Children | Introduction (Section 1) |
| ****NF-κB**** | Nuclear Factor Kappa-Light-Chain-Enhancer of Activated B Cells | Discussion (Section 4.2) |
| ****NMDA**** | N-Methyl-D-Aspartate | Discussion (Section 4.1) |
| ****NRP1**** | Neuropilin-1 | Discussion (Section 4.4) |
| ****OR**** | Odds Ratio | Results (Section 3) |
| ****PCR**** | Polymerase Chain Reaction | Methods (Section 2.2) |
| ****ROC**** | Receiver Operating Characteristic | Results (Section 3.2) |
| ****RT-PCR**** | Reverse Transcription Polymerase Chain Reaction | Methods (Section 2.2) |
| ****SARS-CoV-2**** | Severe Acute Respiratory Syndrome Coronavirus 2 | Abstract / Introduction (Section 1) |
| ****TNF-α**** | Tumor Necrosis Factor Alpha | Discussion (Section 4.1) |
| ****Tregs**** | Regulatory T Cells | Discussion (Section 4.2) |
